# Supplementary material for: Efficacy and safety of transarterial chemoembolization alone compared to its combination with anlotinib among patients with intermediate or advanced stage hepatocellular carcinoma: a phase II randomized controlled trial
Source: PubMed Central journal article supplement — J Gastrointest Oncol. 2024 Aug 28;15(4):1627–35. doi: 10.21037/jgo-24-497 (PMC11399860; doi:10.21037/jgo-24-497), 2024-08-28
Supplement: jgo-15-04-1627-tp.pdf [file jgo-15-04-1627-tp.pdf]

**项目标题：TACE 联合安罗替尼对照单纯 TACE 治疗中晚期肝癌患者的单中心、随机对照临床研究**

**主要研究者：邵国良**

**联系电话：**

（虚拟网）

**本院研究科室：介入科**

**组长单位：浙江省肿瘤医院**

（如为多中心研究）

**课题承担单位：浙江省肿瘤医院**

## 临床研究方案签名页

临床研究方案名称：**TACE 联合安罗替尼对照单 TACE  
治疗中晚期肝癌患者的单中  
心、随机对照临床研究**

我同意按本文件所述的方案开展临床研究，并申明在临床研究过程中遵守《药物  
临床试验质量管理规范》、相关法律法规的要求。

中心名称：浙江省肿瘤医院

主要研究者签名：\_\_\_\_\_

日期：\_\_\_\_\_

地址：浙江省杭州市拱墅区半山东路1号；

## 研究方案概要

一、项目名称：TACE 联合安罗替尼对照单纯 TACE 治疗中晚期肝癌患者的单中心、随机对照临床研究

二、项目负责人：邵国良

三、研究团队成员：

四、临床科研科室：介入科

五、研究目的、意义：

TACE 由于其对播散卫星灶和门静脉癌栓的治疗有限，之后的复发转移率也较高，难以控制病灶的远处转移，患者的长期生存率并不令人满意，安罗替尼是一种多靶点小分子 TKI，安罗替尼通过抑制 VEGFR-2、VEGFR-3、EGFR、c-Kit、PDGF、FDFR 以及 c-Met 等多个靶点发挥抗癌作用，因此希冀通过盐酸安罗替尼联合 TACE 能够提高疗效，进一步改善中晚期肝癌患者的生存并提供更多的临床依据。

六、立题依据：

在全球范围内，原发性肝癌是最常见的恶性肿瘤之一，在男性人群中，其发病率位列所有恶性肿瘤的第五位，在女性人群中，其发病率位列所有恶性的第九位，而在整体人群中，原发性肝癌是第二大致死性恶性肿瘤，仅次于肺癌。我国是乙肝大国，也是肝癌大国，全球一半以上新发的原发性肝癌发生在中国，严重威胁人们的生活质量。虽然 TACE 可有效控制病情进展，但由于其对播散卫星灶和门静脉癌栓的治疗有限，之后的复发转移率也较高，难以控制病灶的远处转移，患者的长期生存率并不令人满意。因此，基于以 TACE 为主的介入治疗的研究，一直以弥补 TACE 的局限性为主要方向安罗替尼是一种小分子血管靶向药物，项基础研究表明：安罗替尼通过抑制 VEGFR-2、VEGFR-3、EGFR、c-Kit、PDGF、FDFR 以及 c-Met 等多个靶点发挥抗癌作用。安罗替尼的抗癌谱广泛，对肺癌、软组织肉瘤、甲状腺髓样癌、肾癌等多种实体瘤均有较好的临床获益，且其具有安全性好、口服方便等优势，有望为晚期肿瘤患者的带来新的希望。

## 七、国内外开展情况:

经肝动脉血管介入治疗是目前肝癌非手术治疗中应用最广泛的治疗手段。主要是指经肝动脉化疗栓塞术(transarterial chemoembolization, TACE)和经肝动脉栓塞术(transarterial embolization, TAE)。TACE是中期肝癌患者最常用的治疗方法,对于肝功能Child-Pugh A-B、肿瘤大小超过5 cm或多发肿瘤无脉管侵犯和肝外转移的患者可作为首选方法。Choi等分析了TACE治疗肝癌的安全性及疗效,提示TACE可显著改善多发、肿瘤较大且肝功能不能耐受手术的患者预后,5年存活率可以达到30%。TACE客观有效率在15%~61%之间,TACE与保守治疗相比能够明显阻止肿瘤的进一步恶化。其他的荟萃分析也表明,TACE较传统治疗方法更能改善患者的存活率。Takayasu等报道的4966例接受TACE的肝癌患者中,平均存活时间为3.3m,5年存活率达到34%。

国际多中心III期临床SHARP试验和以亚洲患者为主的III期临床试验ORIENTAL研究均证实索拉非尼可显著延长晚期进展期肝细胞癌患者的疾病进展事件和总生存时间。由此,索拉非尼被确立成为晚期肝癌一线标准治疗方案。索拉非尼联合TACE治疗肝癌方面的研究主要有全球的SPACE和亚洲区的START研究。二者比较了索拉非尼联合TACE和TACE单独/联合安慰剂治疗不可切除肝细胞癌的疗效。SPACE结果显示,与安慰剂组相比,索拉非尼组的疾病进展风险降低了20.3%。START研究显示,与TACE单独治疗相比,2年生存率显著提高;而中国区亚组分析结果提示中位疾病进展时间(TTP)为10.6个月,中位无进展生存时间(PFS)为10.3个月,中位生存时间达16.5个月。

舒尼替尼也是一个多种受体酪氨酸激酶的多靶点分子靶向药物。其靶点包括PDGF $\alpha$ 、PDGF $\beta$ 、VEGFR-1、VEGFR-2、VEGFR-3、KIT、FLT-3、集落刺激因子受体1型(CSF-1R)和RET,通过干扰信号传导,达到抑制肿瘤生长和发展的作用。但舒尼替尼的III期研究提示其不良反应高于索拉非尼组,而有效率及生存率并不优于索拉非尼,故该研究已提前终止。Liang等利用三维适形放射治疗(3DCRT)技术治疗了128例原发性肝癌患者,Child A级患者占84%,中位放射剂量54Gy,放疗结束后3个月局部控制率达69%,1和3年总生存率分别为65%和33%。

由于目前肝癌放疗的临床研究循证医学证据级别均不高,因此各类肝癌指南中对放疗的推荐级别差别较大,但均认为肝功能为Child-Pugh C级的患者不适宜接受放疗。以射频消融(radiofrequency ablation, RFA)为代表的局部消融治疗在肝癌治疗中发挥了重要作用,是目前肝癌治疗手段中不可缺少的部分。

但对于中晚期肝癌,局部消融治疗也不是没有用武之地,和其他治疗方式的有效结合、优势互补,也可以获得不错的治疗效果。中国“肝癌射频消融治疗规范的专家共识”中也明确提出对于不能手术切除的直径 $>5$  cm的单发肿瘤或最大直径 $>3$  cm的多发肿瘤,局部

消融可作为姑息性治疗或联合治疗的选择之一。

多种消融方式之间的相互结合也是提高局部控制率,减小局部复发的有效方法。Zhang等进行了1项临床研究,分别应用RFA+PEI和RFA治疗直径 $\leq 7.0$  cm的肝癌66及67例,研究结果显示RFA+PEI联合治疗组疗效优于单纯RFA治疗组,尤其对位于大血管,胆道以及重要脏器旁的病灶,联合治疗优势更加明显。

## 八、研究方法:

### 1、研究对象及数量

(1) 申请人所在单位入选人数和入选受试者总数: 40 / 40

(2) 受试者的年龄跨度: 18 岁至 75 岁

(3) 招募受试者

谁负责招募:  医生,  研究者,  研究助理,  研究护士,  其他: \_\_\_\_\_

招募方式:  广告,  诊疗过程,  数据库,  中介,  其他:

招募人群特征(包含请打钩):  健康者,  患者,  弱势群体,  孕妇

● 弱势人群的特征(选择弱势人群,填写选项):

儿童/未成年人,  认知障碍或健康状况而没有能力做出知情同意的成人,  申办者/研究者的雇员或学生,  教育/经济地位低下的人员,  疾病终末期患者,  囚犯或劳教人员,  其他: \_\_\_\_\_

● 知情同意能力的评估方式(选择弱势群体,填写该选项):

临床判断,  量表,  仪器

● 涉及孕妇研究的信息(选择孕妇,填写该选项):

没有通过经济利益引诱其中止妊娠,  研究人员不参与中止妊娠的决策,  研究人员不参与新生儿生存能力的判断

(4) 研究对象的入选标准、排除标准、终止标准

入选标准:

1. 无化学治疗禁忌症,心、肺、肝、肾等主要器官功能无明显障碍;
2. 巴塞罗那肝癌临床分期(BCLC)分期B期或C期的患者;
3. 肝功能child-pugh分级A级或B级;卡氏(Karnofsky, KPS)评分 $>60$ 分;
4. 无法接受外科手术切除治疗或拒绝外科手术切除;且术前未接受其他治疗的患者;
5. 18~75岁; ECOG PS评分: 0-1分; 预计生存期超过3月。

排除标准：

1. 有化学治疗禁忌症者；
2. 心、肺、肝、肾等重要脏器功能障碍者；
3. 具有严重凝血功能障碍者（凝血酶原时间 $>18s$ 或具有出血倾向）；
4. 因难以耐受不良反应或其他原因停药超过一个月者；
5. 存在门静脉主干癌栓者；
6. 不能控制的高血压及门静脉高压者。

终止标准：

1. 研究者认为受试者不适宜继续试验，需要退出
2. 受试者主动要求撤回知情，退出研究。

(5) 研究需要收集的具体材料：

信息，  体液，  血液，  组织，  其他\_\_\_\_\_

(6) 获取材料来源（请在选项框打钩，可多选）：

不适用，  手术切除标本，  静脉穿刺，  腹腔穿刺，  住院病史摘录，  
 剩余的人体材料（说明）  
 人口普查 / 户口档案记录，  生物样本库，  病理科（如石蜡切片等），  
 检验科，  病案室，  在院病人，  出院病人，  
 健康人群  其它（说明）：

## 2、研究步骤

研究分为两组：

1、对照组：给予 TACE 治疗。

具体方法如下：

采用改良式 seldinger 穿刺，经皮-股动脉穿刺并成功插入导管以及进行肝动脉造影，对肝组织病变的位置、形态、血供情况等进行全面了解，并结合全身情况确定化疗药物的使用以及栓塞剂碘

油的剂量。将导管导入肿瘤的供给血管，根据情况注入5-FU、阿霉素等，栓塞剂以碘油为载体混合化疗药物同时注入，再以明胶海绵进行辅助栓塞。治疗前给予止吐药，术后给予保肝药。直至出现疾病进展。

2、试验组：给予TACE联合安罗替尼治疗。

具体方法如下：

在对照组的基础上给予盐酸安罗替尼12mg，早餐前口服，每日下调10mg/d；如不良反应完全恢复，可恢复至上一剂量水平，在肝功能未受损的情况下（根据患者转氨酶及胆红素水平等实验室指标综合判断），进行后续TACE治疗，治疗前3d停用安罗替尼，治疗后3d继续给予安罗替尼治疗。直至出现疾病进展，受试者主动撤回知情同意、出现不可耐受的毒性。

随访：

所有患者经TACE联合口服安罗替尼或单纯TACE治疗，间隔28天门诊或住院随访1次，随访内容包括：血常规、总胆红素水平、白蛋白水平、血清转氨酶含量、凝血功能、乙肝5项、甲胎蛋白含量、血肌酐和尿素氮、增强CT或MRI（每2个月1次）、药物不良反应等。直至出现疾病进展、受试者主动撤回知情同意、出现不可耐受的毒性。

研究入组大约需要12个月，将在出现20个PFS事件（疾病进展或死亡）时，进行主要研究终点PFS的分析，预计在入组最后一例受试者之后的12个月之后进行。

在经过主要研究终点PFS分析之后，整个研究和随访还将继续进行，直至出现（60%-80%）的死亡事件，进行次要研究终点OS的分析

### 3、技术路线

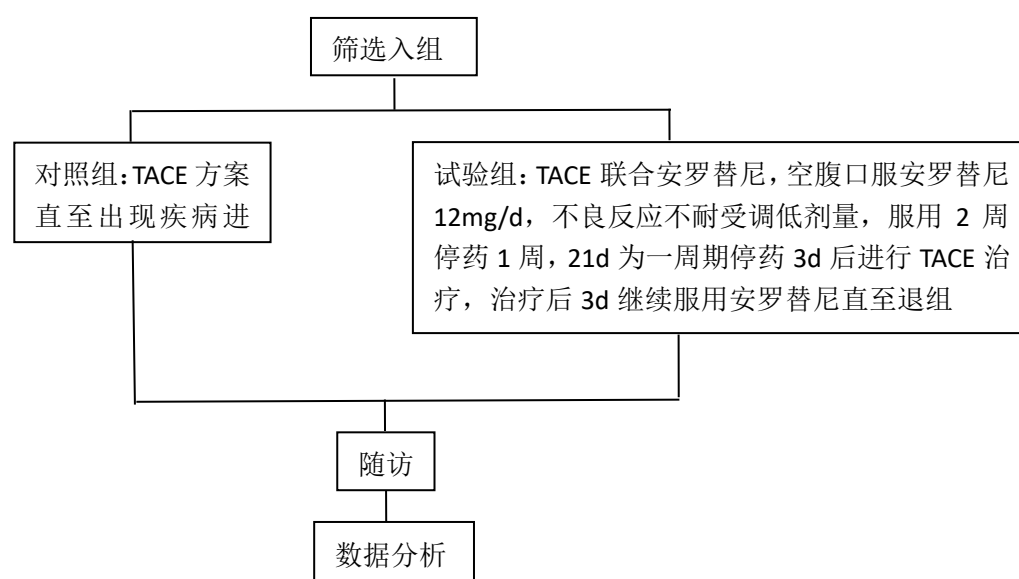

#### 4、研究期限及进度

预计试验开始时间：2018年10月

预计完成入组时间：2019年10月

预计试验结束时间：2020年10月

#### 5、保密措施

对于患者信息录入采用编码方式替代真实姓名，入组后给予每个病例入组号，在除病史资料外的所有资料及数据按入组号专门保管在临床研究储存柜中，对获取的患者个人资料和信息进行专人保管，非研究小组成员无权查看。

6、风险/受益评估（概述本研究可能提供给个人受试者、受试者群体或社会的可能效益或好处。如果没有直接的利益给个人，请在前面说明。）

6.1 此科研是否导致研究对象的临床干预：是， 否

6.2 此研究是否对研究对象增加额外负担：是， 否

6.3 此研究是否涉及个人隐私：是， 否

6.4 此研究是否涉及特殊情况：否

6.5 执行本项目是否会损害研究对象权益：否

6.6 是否给患者一定的补偿？无

6.7 本项科研是否额外增加研究对象的医疗检查与治疗费用：是， 否

如有额外增加研究对象的医疗检查与治疗费用，这些费用将：

免费， 部分免费， 不免费

6.8 造成危害后对患者赔偿的金额及来源？

6.9 科研结果怎样体现我院的贡献？

目前没有相关研究在国内开展，本科研项目的结果将安罗替尼在肝癌领域发现更广阔的应用前景。为晚期肝癌患者带来更高的生存获益。

6.10 预期的不良反应？

进行标准治疗所可能导致的不良反应，及服用安罗替尼常见不良反应。

6.11 控制风险的措施：

是否制定了数据与安全监察计划？ 是 否 不适用

针对可能的风险制定了哪些的医疗对策？请选择：

排除对科研风险更敏感或更易受伤害的个体或群体参与科研；

预期不良反应的处理方案与程序；

紧急破盲机制；

提前终止科研标准；

九、应急预案（如涉及非常规性诊疗与操作，或该项目实施对患者可能存在一定的风险）

下表为当发生与研究药物相关性毒性反应而建议采取的延迟给药时间和/或剂量水平



改变方案。当患者发生肝功能异常、出血、蛋白尿、血小板计数下降等毒性反应时则参照后续单独表格要求执行。

| 不良反应级别NCI | 给药时间                        | 剂量调整                            |
|-----------|-----------------------------|---------------------------------|
| 0-2 级     | 按时给药                        | 不改变                             |
| 3 级       | 延迟给药直至程度恢复至<2级 <sup>#</sup> | 下调 1 个剂量水平                      |
| 4 级       | 延迟给药直至程度恢复至<2级 <sup>#</sup> | 下调 1 个剂量水平。根据治疗研究者判断可以考虑永久终止治疗。 |

<sup>#</sup>：如果延迟 2 周后仍未恢复，那么应该永久性终止治疗。

下表为当发生肝功能异常（ALT 升高、AST 升高或总胆红素升高）建议采取的延迟给药时间和/或剂量水平改变方案。

| AE 级别     | 剂量调整方案                      | 处理建议                                       |
|-----------|-----------------------------|--------------------------------------------|
| 1 级       | 维持原有剂量                      | 按计划随访                                      |
| 2 级(基线正常) | 延迟给药，2 周内能恢复至< 2 级，降低一个剂量水平 | 积极保肝处理并严密监测肝功能，每周 1 次                      |
| 2 级(基线异常) | 维持原有剂量                      | 积极保肝处理并严密监测肝功能，每周 1 次                      |
| 3 级       | 延迟给药，2 周内能恢复至<2 级，降低一个剂量水平  | 积极保肝处理并严密监测肝功能，每周 2 次；直至毒性恢复至< 2 级或有原因解释   |
| 4级        | 永久性终止治疗                     | 积极保肝处理并严密监测肝功能，每周 1~2 次；直至毒性恢复至< 2 级或有原因解释 |

下表为当发生蛋白尿而建议采取的延迟给药时间和/或剂量水平改变方案。

| AE 级别 | 剂量调整方案 | 处理建议 |
|-------|--------|------|
|-------|--------|------|

|                                                   |                                 |                                   |
|---------------------------------------------------|---------------------------------|-----------------------------------|
| 1 级: 尿常规检查示尿蛋白+或24 小时尿蛋白定量检测 <1.0g                | 维持原有剂量                          | 按计划访视                             |
| 2 级: 尿常规检查示尿蛋白++, 但 24 小时尿蛋白定量 检测在 1.0g~2.0g (不含) | 维持原有剂量                          | 积极治疗并监测尿常规 (每周 1 次); 必要时请肾内科医生会诊  |
| 2 级: 尿常规检查示尿蛋白++或以上, 24 小时尿蛋白定量检测在 2.0g~3.5g (不含) | 延迟给药。2 周能恢复至<2 级, 后续用药降低一个剂量水平。 | 积极治疗, 必要时请肾内科医生会诊, 第三次出现须永久性终止治疗; |
| 3 级: 24 小时尿蛋白定量检测 $\geq 3.5g$                     | 延迟给药。2 周能恢复至<2 级, 后续用药降低一个剂量水平  | 积极治疗, 必要时请肾内科医生会诊; 第三次出现须永久性终止治疗  |

下表为当发生血小板计数下降而建议采取的延迟给药时间和/或剂量水平改变方案。

| AE 级别                                 | 剂量调整方案                        | 处理建议                                       |
|---------------------------------------|-------------------------------|--------------------------------------------|
| 1 级: 血小板计数在 $100\sim 75\times 10^9/L$ | 维持原有剂量                        | 按计划访视                                      |
| 2 级: 血小板计数在 $75\sim 50\times 10^9/L$  | 延迟给药, 1 周内能恢复至< 2 级, 维持原有剂量   | 2~3 天 1 次复查血常规; 并建议进行积极治疗。后续访视中, 每周复查一次血常规 |
|                                       | 延迟给药, 2 周内能恢复至< 2 级, 降低一个剂量水平 | 2~3 天 1 次复查血常规; 并建议进行积极治疗。后续访视中, 每周复查一次血常规 |
| 3 级: 血小板计数在 $50\sim 25\times 10^9/L$  | 延迟给药, 2 周内能恢复至< 2 级, 降低一个剂量水平 | 2~3 天 1 次复查血常规; 并建议进行积极治疗。后续访视中, 每周复查一次血常规 |
| 4 级: 血小板计数在 $< 25\times 10^9/L$       | 永久性终止治疗                       | 每天复查血常规直至恢复至 $\leq 2$ 级; 积极输注单采血小板并进行积极治疗。 |

下表为当发生出血事件后建议采取的延迟给药时间和/或剂量水平改变方案。

| AE 级别      | 剂量调整方案                        | 处理建议   |
|------------|-------------------------------|--------|
| 1 级        | 维持原有剂量                        | 按计划随访  |
| 2 级        | 延迟给药, 2 周内能恢复至< 2 级, 降低一个剂量水平 | 积极处理   |
| $\geq 3$ 级 | 永久性终止治疗                       | 紧急医学干预 |

#### 常见不良反应的对症处理指南

## 1. 手足综合症

手足症候综合症是手掌-足底感觉迟钝或肢端变红，明显不舒服，肿胀，麻刺感，受压或受力区域表现更为明显。肿瘤病人在接受化疗或分子靶向治疗的过程中可出现。

1级时表现为无痛性轻微皮肤改变或皮炎（如红斑，水肿，角化过度）；2级时表现为痛性皮肤改变（如剥落，水泡，出血，肿胀，角化过度）；影响工具性日常生活活动；3级时表现为重度皮肤改变（剥落，水泡，出血，水肿，角化过度），伴疼痛；影响个人日常生活活动。

对于1级毒性患者，常无需支持治疗，2级或以上毒性患者考虑应用以下对症支持治疗：包括：加强皮肤护理，保持皮肤清洁，避免继发感染；避免压力或摩擦；使用润肤霜或润滑剂，局部使用含尿素和皮质类固醇成分的乳液或润滑剂；必要时局部使用抗真菌或抗生素治疗。

## 2. 高血压

### 靶向药物相关高血压的特殊处理（供参考）

靶向药物治疗导致高血压的情况：

贝伐单抗、索拉非尼、舒尼替尼等血管生成抑制剂，靶向作用于VEGF信号途径，可引起高血压或者使原有高血压加重。其主要作用机制可能是：内皮细胞/血小板分泌NO/PGI<sub>2</sub>下降、血管密度异常（小血管及毛细血管）、血管僵硬、内皮素功能紊乱。其中舒尼替尼还可导致左室射血分数（LVEF）下降。

此类高血压的监测和处理：在开始靶向药物治疗前6周，应该每周进行血压监测。一旦出现高血压，可给予以下标准治疗药物：血管紧张素II受体阻滞剂（ARB）、血管紧张素转换酶抑制剂（ACEI）、钙离子拮抗剂（CCB）、β受体阻滞剂、利尿剂等，或者前述药物的联合应用；依据安罗替尼前期试验高血压处理经验，建议先给予ARB或ACEI类药物，血压控制不佳者，可再联合应用CCB或其它药物。

由于抗VEGF/VEGFR靶向治疗药物是引起NO合成下降最终激活肾素-血管紧张素-醛固酮系统引起高血压，因此降压治疗最好选用血管紧张素转换酶（ACE）抑制剂（如卡托普利、依那普利、贝那普利及西拉普利等）治疗；部分对ACE抑制剂过敏或不能耐受的患者，可应用血管紧张素II受体阻滞剂（ARB，如氯沙坦、缬沙坦、伊贝沙坦及替米沙坦等）治疗。ARB除可降低血压外，对缓解蛋白尿也有益处。血管紧张素转换酶抑制剂可用于有慢性肾病、蛋白尿和代谢综合征的患者；二氢吡啶类钙离子拮抗剂适用于老年患者。

安罗替尼同类药物导致高血压的治疗参考：索拉非尼治疗后的高血压一般发生在用药后1~2周，伴随用药可以持续应用，常规抗高血压治疗多可以控制。对于难以控制的血压升高，一般也可以通过减少靶向药物的药量或者停药而缓解。

靶向治疗导致高血压的优化选择药物（非肝代谢）：

- 1) 缬沙坦（代文），80~320 mg Qd；
- 2) 阿替洛尔（氨酰心安），50~100 mg Qd；
- 3) HCTZ（海捷亚），12.5~100 mg Qd；

- 4) 替米沙坦(美卡素), 20~80 mg Qd; 对于血压难以控制者: 氨氯地平(络活喜), 2.5~10 mg Qd。

### 临床高血压分期及各期常规处理方法(供参考)

高血压前期: (120-139/80-89 mmHg, 或收缩压为120-139 mmHg) 无使用降压药的指征, 仅监测血压;

1级高血压: (140-159/90-99 mmHg, 或收缩压为140-159 mmHg) 药物降压同时监测血压; 多数使用噻嗪类利尿剂, 也可考虑使用 ACEI、血管紧张素 II 受体阻滞剂、 $\beta$  受体阻滞剂、钙通道阻滞剂; 可继续服用安罗替尼, 如降压不理想可考虑联合使用两种降压药;

2级高血压: (160-179/100-109 mmHg, 或收缩压为160-179 mmHg) 联合使用2种药物(通常是噻嗪类利尿剂与 ACEI 或  $\beta$  受体阻滞剂或钙通道阻滞剂); 监测血压;

3级高血压: ( $\geq 180/110$  mmHg, 或收缩压 $\geq 180$  mmHg) 联合使用2种药物(通常是噻嗪类利尿剂与 ACEI 或  $\beta$  受体阻滞剂或钙通道阻滞剂); 严密监测血压; 评估其他危险因素(如靶器官损害、糖尿病以及伴有的其他临床症状), 采取相应措施;

高血压危象: 指血压过度升高舒张压超过120~130 mmHg 的严重临床状态。国内外目前暂无统一分类法; 近来从临床治疗角度考虑将其分为两型: (1) 高血压急症(Hypertension emergencies) 舒张压 $>120$  mmHg, 伴有急性或进行性的靶器官损害, 如脑梗死、颅内或蛛网膜下腔出血、高血压脑病等, 其中以慢性原发性高血压基础上的渐进性或急进性高血压最常见(约40%~50%)。 (2) 高血压紧急状态(Hypertension urgencies), 舒张压 $>120$  mmHg 不伴有或仅有轻微的器官损害; 应用硝普钠或硝苯地平等迅速降压, 地西洋及苯巴比妥制止抽搐, 呋塞米及甘露醇脱水、排钠、降低颅内压;

注: 出现高血压危象者应终止安罗替尼用药, 退出本临床研究。

### 常规降压药的使用原则(供参考)

现在对于高血压常规联合用药的组合采用 ACEI (或血管紧张素 II 受体阻滞剂) 与利尿药; 钙通道阻滞剂与  $\beta$  受体阻滞剂; ACEI 与钙通道阻滞剂; 利尿药与  $\beta$  受体阻滞剂;  $\alpha$  受体阻滞剂与  $\beta$  受体阻滞剂。以下对临床常用高血压药物的使用进行概述。

#### • 利尿剂

利尿剂主要用于轻中度高血压, 尤其在老年人高血压或并发心力衰竭时。痛风患者禁用, 糖尿病和高脂血症患者慎用。小剂量可以避免低血钾、糖耐量降低和心律失常等不良反应。可选择使用双氢氯噻嗪(Hydrochlorothizide) 12.5 mg, 每日1-2次; 吲达帕胺(Indapamide) 1.25-2.5 mg, 每日1次。呋塞米(Furosemide) 仅用于并发肾功能衰竭时。

#### • $\beta$ 受体阻滞剂

$\beta$  受体阻滞剂主要用于轻中度高血压, 尤其在静息时心率较快( $>80$  次/分)的中青年患者或合并心绞痛时。心脏传导阻滞、哮喘、慢性阻塞性肺病与周围血管病患者禁用。胰岛素依赖性糖尿病患者慎用。可选择使用美托洛尔(Metoprolol) 50 mg, 每日1-2次; 阿替洛尔(Atenolol)

25 mg, 每日1-2次; 比索洛尔 (Bisoprolol) 2.5-5 mg, 每日1次; 倍他洛尔 (Betaxolol) 5-10 mg, 每日1次。β受体阻滞剂可用于心衰, 但用法与降压完全不同, 应加注意。

- 钙通道阻滞剂

钙通道阻滞剂可用于各种程度高血压, 尤其在老年人高血压或合并稳定型心绞痛时。心脏传导阻滞和心力衰竭患者禁用非二氢吡啶类钙通道阻滞剂。不稳定性心绞痛和急性心肌梗塞时禁用速效二氢吡啶类钙通道阻滞剂。优先选择使用长效制剂, 例如非洛地平 (Felodipine) 缓释片 5-10 mg, 每日1次; 硝苯地平 (Nifedipine) 控释片 30 mg, 每日1次; 氨氯地平 (Amlodipine) 5-10 mg, 每日1次; 拉西(Lacidipine) 4-6 mg, 每日1次; 维拉帕米 (Verapamil) 缓释片 120-240 mg, 每日1次。一般情况下也可使用硝苯地平或尼群地平普通片 10 mg 每日 2-3 次。慎用硝苯地平速效胶囊。

- 血管紧张素转换酶抑制剂

血管紧张素转换酶抑制剂主要用于高血压合并糖尿病, 或者并发心脏功能不全、肾脏损害有蛋白尿的患者。妊娠和肾动脉狭窄、肾功能衰竭 (血肌酐 > 265 μmol/L 或 3 mg/dL) 患者禁用。可以选择使用以下制剂: 卡托普利 (Captopril) 12.5-25 mg, 每日 2-3 次; 依那普利 (Enalapril) 10-20 mg, 每日 1-2 次; 培哚普利 (Perindopril) 4-8 mg, 每日 1 次; 西拉普利 (Cilazapril) 2.5-5 mg, 每日 1 次; 苯那普利 (Benazapril) 10-20 mg, 每日 1 次; 雷米普利 (Ramipril) 2.5-5 mg, 每日 1 次; 赖诺普利 (Lisinopril) 20-40 mg, 每日 1 次。

- 血管紧张素 II 受体阻滞剂

血管紧张素 II 受体 (AT1) 拮抗剂, 例如氯沙坦 (Losartan) 50-100 mg, 每日 1 次, 缬沙坦 (Valsartan) 80-160 mg, 每日一次。适用和禁用对象与 ACEI 同, 目前主要用于 ACEI 治疗后发生干咳的患者。

### 安罗替尼引起高血压处理推荐

首选血管紧张素 II 受体 (AT1) 拮抗剂或者血管紧张素转换酶抑制剂, 降压效果不好者加用钙通道阻滞剂。

### 3. 消化道出血的处理

如患者出现大便潜血 (++) 以上、呕血或鲜血便等, 应该注意鉴别诊断和判断出血的部位。对于上消化道应禁食, 给予制酸、保护胃粘膜、止血 (止血环酸、立止血等), 必要时可以使用奥曲肽等; 对于下消化道出血者, 应积极给予止血、支持对症治疗, 出血无法控制者, 必要时需外科处理。

### 4. 蛋白尿的处理

在开始抗血管生成药物治疗之前应监测 24 小时尿蛋白, 如尿常规提示尿蛋白 ≥ ++ 且证实 24 小时尿蛋白定量 > 1.0 g, 则不符合本研究入组标准。

在整个治疗期间对所有患者密切监测蛋白尿, 对有高血压病史者加强监测; 对连续 2 次尿蛋白 ≥ ++ 者, 须行 24 小时尿蛋白测定。

出现蛋白尿后, 剂量调整所遵循的原则如下: 尿蛋白+或 $\leq 1$  g/24h 时按计划继续给药并对症处理; 尿蛋白 $^{++\sim+++}$ 或 $1\sim 2$  g/24h 的, 先给予对症处理, 如7天内无好转, 可下调一个剂量水平继续给药; 尿蛋白 $^{++++}$ 或 $> 2$  g/24h 的, 则暂停给药并对症处理, 直至尿蛋白 $\leq 1$  g/24h 后下调一个剂量水平继续给药; 如果出现4度蛋白尿(肾病综合征), 则永久性停药, 退出本临床研究。

#### 十、数据处理(统计分析)

所有统计分析将采用 SAS 9.1.3 统计分析软件编程计算。所有的统计学检验均采用双侧检验,  $P$  值 $\leq 0.05$  将被认为所检验的差别有统计意义, 可信区间采用 95%的可信度。

本次试验根据初始给药剂量分组及治疗结束时给药剂量分组分别进行分析。

基线数据按全分析集进行分析, 所有有效性指标均按全分析集和符合方案集进行分析; 安全性分析采用安全性分析集。

不同治疗组各次就诊的计量资料将采用均数 $\pm$ 标准差或中位数(最小值, 最大值)进行统计描述。与筛选期基础值进行比较, 采用配对  $t$  检验比较组内前后差异。各组治疗前后的变化采用方差分析(ANOVA)或秩和检验进行比较。不同治疗组各次就诊的计数资料采用频数(构成比)进行统计描述。各组治疗前后的变化用  $\chi^2$  检验精确概率法或非参数检验。

1) 脱落分析: 主要采用描述性分析, 必要时对各组总脱落率和由于 AE 而脱落的比较将采用  $\chi^2$  检验或计算 *Fisher* 精确概率。

2) 基础值的均衡性分析: 采用方差分析或  $\chi^2$  检验来比较人口学资料和其它基础值指标, 以衡量各组均衡性如何。

3) 有效性分析: 对两组临床有效率、临床受益率的比较, 分别采用考虑和不考虑中心分层的 CMH- $\chi^2$  检验对两组疗效进行比较, 并计算组间差值的 95%可信区间。对于指标 PFS 及 OS, 采用乘积限法, 并根据资料的实际情况分别计算 25%、50%(中位)、75%PFS 及治疗开始后不同时间的 OS, 并采用 Log-Rank 检验对两组指标进行比较。

4) 安全性分析: 以描述性统计分析为主, 列表描述本次试验所发生的 AE, 必要时采用 *Fisher* 确切概率法比较各组 AE 的发生率。实验室检验结果描述试验前正常但治疗后异常的情况以及发生异常改变时与试验药物的关系。

#### 十一、预期研究结果及其重要意义

预期 TACE 联合安罗替尼对于中晚期肝癌患者获益更多, PFS 延长, 不良反应可控, 为肝癌患者提供更多的临床治疗选择。
